# Supplementary material for: Opioid Prescription Method for Breathlessness Due to Non-Cancer Chronic Respiratory Diseases: A Systematic Review
Source: MDPI journal article supplement (doi:10.3390/ijerph19084907), 2022-04-18
Supplement: s1 [file s1]

Table S1. Research strategy in MEDLINE and Chocrane  
MEDLINE

|     | Search formula                                                                                                                                                                                                                             |
|-----|--------------------------------------------------------------------------------------------------------------------------------------------------------------------------------------------------------------------------------------------|
| L1  | S RESPIRATORY INSUFFICIENCY+NT/CT OR LUNG DISEASES, INTERSTITIAL+NT/CT OR PULMONARY DISEASE, CHRONIC OBSTRUCTIVE+NT/CT OR BRONCHIECTASIS+NT/CT                                                                                             |
| L2  | S RESPIRATORY(3A)(INSUFFICIEN? OR FAILUR?) OR INTERSTIT?(3A)(LUNG OR PULMONARY OR PNEUMON?) OR CHRONIC?(3A)OBSTRUCT?(3A)(LUNG OR PULMONARY OR AIRWAY OR AIRFLOW?)                                                                          |
| L3  | S BRONCHIECTAS? OR FIBROS?(3A)(PULMONARY OR ALVEOLI?) OR EMPHYSEM?(3A)(PULMONARY OR FOCAL OR PANACINAR? OR PANLOBUL? OR CENTRIACINAR?) OR CHRONIC?(3A)BRONCHIT? OR ((CYSTIC FIBROSIS+NT/CT OR CYSTIC?(3A)FIBROS?) AND (LUNG OR PULMONARY)) |
| L4  | S (REFRACTORY? OR INTRACTABL?)(3A)(DYSPNE? OR DYSPNOE? OR BREATHLESS? OR BREATH(3A)SHORT?) OR *DYSPNEA+NT/CT OR (DYSPNE? OR DYSPNOE? OR BREATHLESS? OR BREATH?(3A)SHORT?)/TI                                                               |
| L5  | S ANALGESICS, OPIOID+NT/CT OR MORPHINE DERIVATIVES+NT/CT OR FENTANYL+NT/CT OR METHADONE+NT/CT OR TRAMADOL+NT/CT OR BUPRENORPHINE+NT/CT                                                                                                     |
| L6  | S OPIOID? OR MORPHIN? OR OXYCODON? OR ?FENTANYL? OR METHADON? OR TRAMADOL? OR BUPRENORPHIN? OR ?CODEIN? OR HYDROMORPHON?                                                                                                                   |
| L7  | S (L1-L4) AND (L5 OR L6)                                                                                                                                                                                                                   |
| L8  | S END(2W)LIFE OR PALLIATIVE CARE+NT/CT OR TERMINAL CARE+NT/CT OR TERMINAL? OR PALLIAT? OR SEVERE? OR ADVANCED?                                                                                                                             |
| L9  | S NONCANCER? OR (NON OR WITHOUT)(W)CANCER?                                                                                                                                                                                                 |
| L10 | S L8 AND L9                                                                                                                                                                                                                                |
| L11 | S L8 NOT (NEOPLASMS+NT/CT OR (CANCER? OR CARCINOM? OR TUMOR? OR TUMOUR? OR NEOPLAS? OR MALIGNAN? OR ONCOLOG?))                                                                                                                             |
| L12 | S L7 AND (L10 OR L11)                                                                                                                                                                                                                      |
| L13 | S L7 AND L6/TI AND (DYSPNE? OR DYSPNOE? OR BREATHLESSNES? OR BREATH?(3A)SHORT? OR BRONCHI? OR FIBROS? OR EMPHYSEM? OR RESPIRATORY(3A)(FAILUR? OR INSUFFICIEN?) OR INTERSTIT? OR OBSTRUCT? OR COPD OR COAD OR IP OR ILD)/TI                 |
| L14 | S L13 AND L9                                                                                                                                                                                                                               |
| L15 | S L13 NOT (NEOPLASMS+NT/CT OR (CANCER? OR CARCINOM? OR TUMOR? OR TUMOUR? OR NEOPLAS? OR MALIGNAN? OR ONCOLOG?))                                                                                                                            |
| L16 | S L14 OR L15                                                                                                                                                                                                                               |
| L17 | S L12 OR L16                                                                                                                                                                                                                               |
| L18 | S L17 AND (1980-2020)/PY AND (19800101-20201031)/UP AND (ENGLISH OR JAPANESE)/LA NOT EPUB?/FS                                                                                                                                              |

## Chochrane

|     | Search formula                                                                                                                                                                                                                                                                                        |
|-----|-------------------------------------------------------------------------------------------------------------------------------------------------------------------------------------------------------------------------------------------------------------------------------------------------------|
| #1  | [mh "RESPIRATORY INSUFFICIENCY"] OR [mh "LUNG DISEASES, INTERSTITIAL"] OR [mh "PULMONARY DISEASE, CHRONIC OBSTRUCTIVE"] OR [mh BRONCHIECTASIS]                                                                                                                                                        |
| #2  | (RESPIRATORY near/2 (INSUFFICIENC* OR FAILURE*) OR INTERSTITIAL near/3 (LUNG OR PULMONARY OR PNEUMONI*) OR CHRONIC near/3 OBSTRUCT* near/3 (LUNG OR PULMONARY OR AIRWAY OR AIRFLOW*)):ti,kw,ab                                                                                                        |
| #3  | (BRONCHIECTAS* OR FIBROSIS near/3 (PULMONARY OR ALVEOLIT*) OR EMPHYSEMA near/3 (PULMONARY OR FOCAL OR PANACINAR OR PANLOBUAR OR CENTRIACINAR) OR CHRONIC near/3 BRONCHIT*):ti,kw,ab                                                                                                                   |
| #4  | ([mh "CYSTIC FIBROSIS"] OR CYSTIC near/3 FIBROSIS:ti,kw,ab) AND (LUNG OR PULMONARY):ti,kw,ab                                                                                                                                                                                                          |
| #5  | ((REFRACTORY OR INTRACTABLE) near/3 (DYSPNE* OR DYSPNOE* OR BREATHLESS* OR BREATH near/3 SHORT*)):ti,kw,ab OR [mh DYPNEA[mj]] OR (DYSPNE* OR DYSPNOE* OR BREATHLESS* OR BREATH near/3 SHORT*):ti                                                                                                      |
| #6  | #1 or #2 or #3 or #4 or #5                                                                                                                                                                                                                                                                            |
| #7  | [mh "ANALGESICS, OPIOID"] OR [mh "MORPHINE DERIVATIVES"] OR [mh FENTANYL] OR [mh METHADONE] OR [mh TRAMADOL] OR [mh BUPRENORPHINE]                                                                                                                                                                    |
| #8  | (OPIOID* OR MORPHIN* OR OXYCODON* OR *FENTANYL* OR METHADON* OR TRAMADOL* OR BUPRENORPHIN* OR *CODEIN* OR HYDROMORPHON*):ti,kw,ab                                                                                                                                                                     |
| #9  | #6 and (#7 or #8)                                                                                                                                                                                                                                                                                     |
| #10 | ([mh "PALLIATIVE CARE"] OR [mh "TERMINAL CARE"] OR (END near/2 LIFE OR TERMINAL* OR PALLIAT* OR SEVERE* OR ADVANCED*)):ti,kw,ab)                                                                                                                                                                      |
| #11 | NONCANCER* OR (NON OR WITHOUT) next CANCER*:ti,kw,ab                                                                                                                                                                                                                                                  |
| #12 | #10 and #11                                                                                                                                                                                                                                                                                           |
| #13 | #10 NOT ([mh NEOPLASMS] OR (CANCER* OR CARCINOM* OR TUMOR* OR TUMOUR* OR NEOPLAS* OR MALIGNAN* OR ONCOLOG*)):ti,kw,ab)                                                                                                                                                                                |
| #14 | #9 and (#12 or #13)                                                                                                                                                                                                                                                                                   |
| #15 | #9 and (DYSPNE* OR DYSPNOE* OR BREATHLESS* OR BRONCHI* OR FIBROS* OR EMPHYSEM* OR FAILUR* OR INSUFFICIEN* OR INTERSTIT* OR OBSTRUCT* OR COPD OR COAD OR IP OR ILD):ti and (OPIOID* OR MORPHIN* OR OXYCODON* OR *FENTANYL* OR METHADON* OR TRAMADOL* OR BUPRENORPHIN* OR *CODEIN* OR HYDROMORPHON*):ti |
| #16 | #15 and #11                                                                                                                                                                                                                                                                                           |
| #17 | #15 NOT ([mh NEOPLASMS] OR (CANCER* OR CARCINOM* OR TUMOR* OR TUMOUR* OR NEOPLAS* OR MALIGNAN* OR ONCOLOG*)):ti,kw,ab)                                                                                                                                                                                |
| #18 | #14 or #16 or #17                                                                                                                                                                                                                                                                                     |
| #19 | #18 with Cochrane Library publication date Between Jan 1980 and Oct 2020, in Cochrane Reviews, Cochrane Protocols, Clinical Answers, Editorials, Special Collections                                                                                                                                  |
| #20 | #18 with Publication Year from 1980 to 2020, in Trials                                                                                                                                                                                                                                                |
| #21 | #19 or #20                                                                                                                                                                                                                                                                                            |

Table S2. Bias risk of the randomized controlled studies.

| Study                                  | Random sequence generation<br>(Selection bias) | Allocation concealment<br>(Selection bias) | Blinding of participants and personnel<br>(performance bias) | Binding of outcomes assessmnet<br>(detection bias) | Incomplete outcome data<br>(attrition bias) | Selective reporting<br>(reporting bias) | Other bias |
|----------------------------------------|------------------------------------------------|--------------------------------------------|--------------------------------------------------------------|----------------------------------------------------|---------------------------------------------|-----------------------------------------|------------|
| Verberkt CA, (2020) <sup>11</sup>      | Low risk                                       | Unclear risk                               | Low risk                                                     | Unclear risk                                       | Low risk                                    | Low risk                                | Low risk   |
| Currow D, (2020) <sup>12</sup>         | Low risk                                       | Low risk                                   | Low risk                                                     | Unclear risk                                       | Low risk                                    | Low risk                                | Low risk   |
| Kronborg-White S, (2020) <sup>29</sup> | Low risk                                       | Unclear risk                               | Low risk                                                     | Unclear risk                                       | Low risk                                    | Low risk                                | Low risk   |
| Ferreira DH, (2019) <sup>21</sup>      | Low risk                                       | Low risk                                   | Low risk                                                     | Unclear risk                                       | Low risk                                    | Low risk                                | Low risk   |
| Abdallah SJ, (2017) <sup>30</sup>      | Unclear risk                                   | Unclear risk                               | Low risk                                                     | Unclear risk                                       | High risk                                   | Low risk                                | Low risk   |
| Abernethy AP, (2003) <sup>25</sup>     | Low risk                                       | Low risk                                   | Unclear risk                                                 | Unclear risk                                       | Low risk                                    | Low risk                                | Low risk   |
| Poole PJ, (1998) <sup>31</sup>         | Low risk                                       | Unclear risk                               | Unclear risk                                                 | Unclear risk                                       | High risk                                   | Low risk                                | Low risk   |
| Light RW, (1996) <sup>19</sup>         | Unclear risk                                   | Unclear risk                               | Low risk                                                     | Unclear risk                                       | Low risk                                    | Low risk                                | Low risk   |
| Eiser N, (1991) <sup>32 1</sup>        | Unclear risk                                   | Unclear risk                               | Unclear risk                                                 | Unclear risk                                       | High risk                                   | Low risk                                | Low risk   |
| Eiser N, (1991) <sup>32 2</sup>        | Unclear risk                                   | Unclear risk                               | Low risk                                                     | Unclear risk                                       | Low risk                                    | Low risk                                | Low risk   |
| Munck LK, (1990) <sup>33</sup>         | Unclear risk                                   | Unclear risk                               | Low risk                                                     | Unclear risk                                       | Low risk                                    | Low risk                                | Low risk   |
| Light RW, (1989) <sup>34</sup>         | Unclear risk                                   | Unclear risk                               | High risk                                                    | Unclear risk                                       | Low risk                                    | Low risk                                | Low risk   |
| Rice KL, (1987) <sup>35</sup>          | Unclear risk                                   | Unclear risk                               | Low risk                                                     | Unclear risk                                       | High risk                                   | Low risk                                | Low risk   |

|                                         |                 |                 |              |                 |           |          |             |
|-----------------------------------------|-----------------|-----------------|--------------|-----------------|-----------|----------|-------------|
| Johnson<br>MA,<br>(1983) <sup>36</sup>  | Unclear<br>risk | Unclear<br>risk | Unclear risk | Unclear<br>risk | Low risk  | Low risk | Low<br>risk |
| Woodcock<br>AA,<br>(1982) <sup>18</sup> | Unclear<br>risk | Unclear<br>risk | Unclear risk | Unclear<br>risk | High risk | Low risk | Low<br>risk |
| Woodcock<br>AA,<br>(1981) <sup>37</sup> | Unclear<br>risk | Unclear<br>risk | Unclear risk | Unclear<br>risk | Low risk  | Low risk | Low<br>risk |

Table S3. Bias risk of non-randomized studies, observational studies, five retrospective studies.

| Study                             | Selection of participants (Selection bias) | Confounding variables (Selection bias) | Measurement of exposure (Performance bias) | Blinding of outcome assessments | Incomplete outcome data | Selective outcome reporting |
|-----------------------------------|--------------------------------------------|----------------------------------------|--------------------------------------------|---------------------------------|-------------------------|-----------------------------|
| Rocker GM, (2013) <sup>38</sup>   | High risk                                  | Low risk                               | Low risk                                   | Unclear risk                    | Low risk                | Low risk                    |
| Currow DC, (2011) <sup>26</sup>   | Low risk                                   | Low risk                               | Low risk                                   | Unclear risk                    | Low risk                | Low risk                    |
| Allcroft P, (2013) <sup>39</sup>  | High risk                                  | Unclear risk                           | Low risk                                   | Unclear risk                    | Low risk                | Low risk                    |
| Allen S, (2005) <sup>40</sup>     | High risk                                  | Low risk                               | Low risk                                   | Unclear risk                    | Low risk                | Low risk                    |
| Smallwood N, (2018) <sup>41</sup> | Low risk                                   | Low risk                               | Low risk                                   | Unclear risk                    | Low risk                | Low risk                    |
| Vicent L, (2017) <sup>42</sup>    | Low risk                                   | Low risk                               | Low risk                                   | Unclear risk                    | Low risk                | Low risk                    |
| Takeyasu M, (2016) <sup>43</sup>  | High risk                                  | Low risk                               | Low risk                                   | Unclear risk                    | Low risk                | Low risk                    |
| Matsuda Y, (2017) <sup>44</sup>   | High risk                                  | Low risk                               | Low risk                                   | Unclear risk                    | Low risk                | Low risk                    |
| Bajwah S, (2012) <sup>5</sup>     | High risk                                  | Low risk                               | Low risk                                   | Unclear risk                    | Low risk                | Low risk                    |
| Tsukuura H, (2013) <sup>45</sup>  | High risk                                  | Low risk                               | Low risk                                   | Unclear risk                    | Low risk                | Low risk                    |
| Colman R, (2015) <sup>46</sup>    | High risk                                  | Low risk                               | Low risk                                   | Unclear risk                    | Low risk                | Low risk                    |
